# Supplementary material for: Comprehensive geriatric assessment for older orthopedic patients and analysis of risk factors for postoperative complications
Source: BMC Geriatr. 2022 Aug 4;22:644. doi: 10.1186/s12877-022-03328-5 (PMC9354431; doi:10.1186/s12877-022-03328-5)
Supplement: Supplementary file 1 — Additional file 1. [file 12877_2022_3328_MOESM1_ESM.docx]

**Table 5. Univariate Analysis of Preoperative CGA Related to Postoperative Complications**

|  | With any complication | p-valuea |  | With any complication | p-valuea |
| --- | --- | --- | --- | --- | --- |
| **ADL** |  | **0.0296 b** | **Renal function** |  | **0.0134 b** |
| independent | 21(19.0%) | normal | 7(0%) |
| mild dysfunction | 58(23.7%) | stage 1, | 22(22.7%) |
| moderate dysfunction | 75(28.4%) | stage 2 | 84(23.8%) |
| severe dysfunction | 45(39.5%) | stage 3a | 69(44.9%) |
| extremely severe dysfunction | 15(58.8%) | stage 3b | 26(38.5%) |
| **VAS** |  | 0.3976 | stage 4 | 4(0%) |
| no pain | 41(31.7%) | stage 5 | 2(0%) |
| mild pain | 75(26.7%) | **Child-Pugh** |  | 0.6248 |
| moderate pain | 33(24.2%) | grade A | 201(31.3%) |
| severe pain | 46(34.8%) | grade B | 7(14.3%) |
| very severe pain | 19(47.4%) | grade C | 6(33.3%) |
| **IADL** |  | **0.0354 b** | **Cardiac risk** |  | 0.3314 |
| normal | 34(17.6%) | low risk | 139(33.1%) |
| mild dependence | 39(25.6%) | high risk | 75(26.7%) |
| moderate dependence | 80(28.8%) | **Respiration risk** |  | 0.1000 |
| serious dependence | 61(44.3%) | 0.5% | 49(32.7%) |
| **Frailty** |  | 0.4054 | 1.8% | 88(25.0%) |
| normal | 17(17.6%) | 4.2% | 68(41.2%) |
| prefrail | 55(29.1%) | 10.1% | 9(0%) |
| frail | 142(33.1%) | **Caprini thrombus risk** |  | 0.4681 |
| **Nutrition MNA** |  | **0.0442 b** | moderate | 3(0%) |
| normal | 114(23.7%) | high | 15(26.7%) |
| at risk of malnutrition | 70(37.1%) | extremely high | 196(31.6%) |
| malnourished | 30(43.3%) | **Massive hemorrhage risk** |  | 0.1497 |
| **Perioperative blood glucose** |  | 0.7418 | low risk | 38(21.1%) |
| met the requirement | 191(31.4%) | high risk | 176(33.0%) |
| failed the requirement | 17(35.3%) | **Cognitive impairment** |  | **0.0052 b** |
| diabetic ketosis | 3(0%) | no impairment | 101(19.8%) |
| hypoglycemia | 3(0%) | mild impairment | 113(40.7%) |
| **Thyroid disease and function** |  | 0.6740 | **Anxiety** |  | 0.6536 |
| Normal | 186(30.6%) | no anxiety | 209(30.6%) |
| hypothyroidism | 11(45.5%) | has anxiety | 5(40.0%) |
| Subclinical hypothyroidism | 13(30%) | **Depression** |  | 0.6536 |
| subclinical hyperthyroidism | 4(25%) | no depression | 209(30.6%) |
| **Stroke risk** |  | 0.8628 | had depression | 5(40.0%) |
| low | 98(32.7%) | **ASA score** |  | 0.0597 |
| moderate | 74(29.7%) | grade II | 39(16.7%) |
| high | 42(28.6%) | grade III | 163(35.3%) |
| **Fall risk** |  | 0.8678 | grade IV | 12(25.0%) |
| slight | 11(27.3%) | **Delirium risk** |  | 0.3127 |
| mild | 71(33.8%) | mild | 15(13.3%) |
| Moderate | 121(28.9%) | moderate | 183(32.2%) |
| high | 11(36.4%) | high | 16(31.3%) |
| **Polypharmacy risk** |  | 0.6465 |  |  |  |
| without risk | 54(33.3%) |  |  |  |
| with risk | 160(30.0%) |  |  |  |

Abbreviations: ADL, Activities of Daily Living; IADL, Instrumental Activities of Daily Living; MNA, Mini nutritional assessment; VAS, visual analogue scale; ASA, American Standards Association scale.

a, Kruskale-Wallis test.

b, Significant differences were found among groups.
